# Supplementary material for: SegVeg: Segmenting RGB Images into Green and Senescent Vegetation by Combining Deep and Shallow Methods
Source: PubMed Central journal article supplement (PMC9680505; doi:10.34133/2022/9803570), 2022-10-11

RGB IMAGE

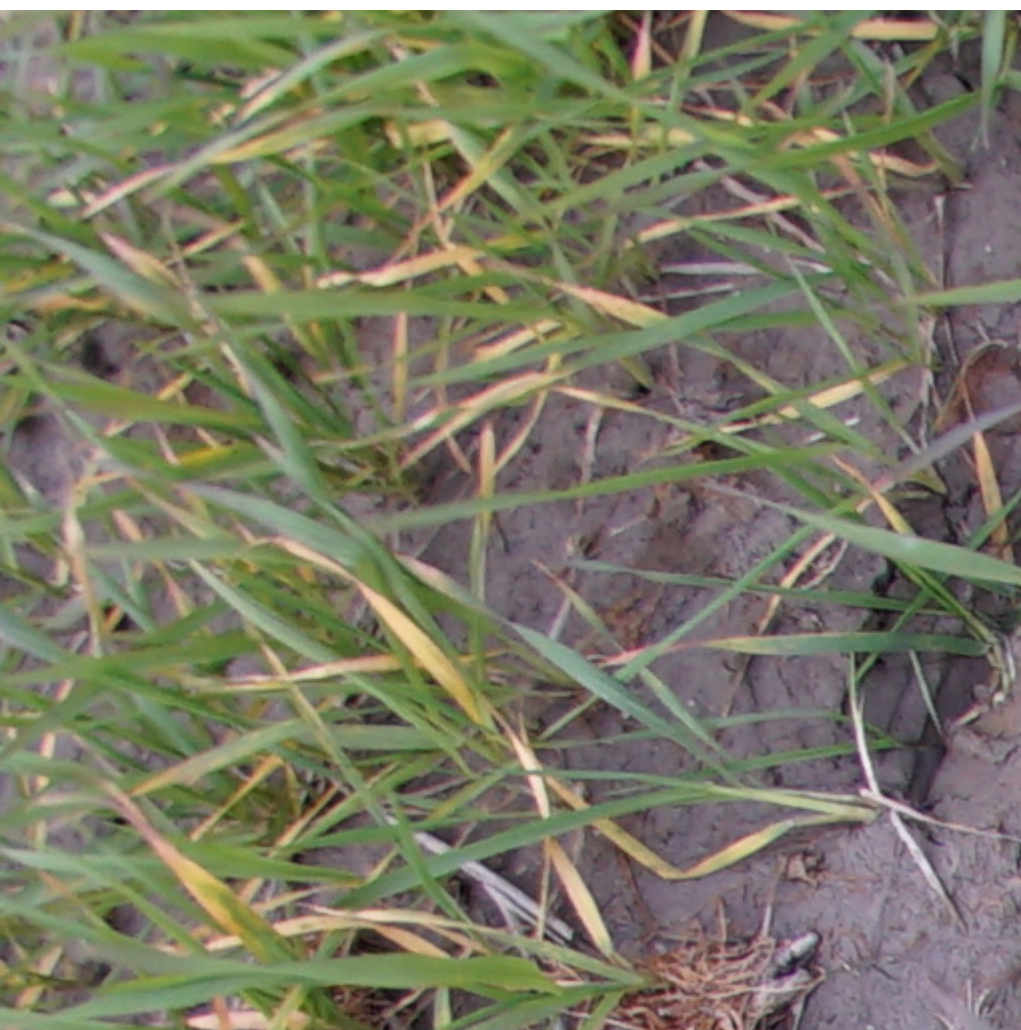

Y (from CMYK)

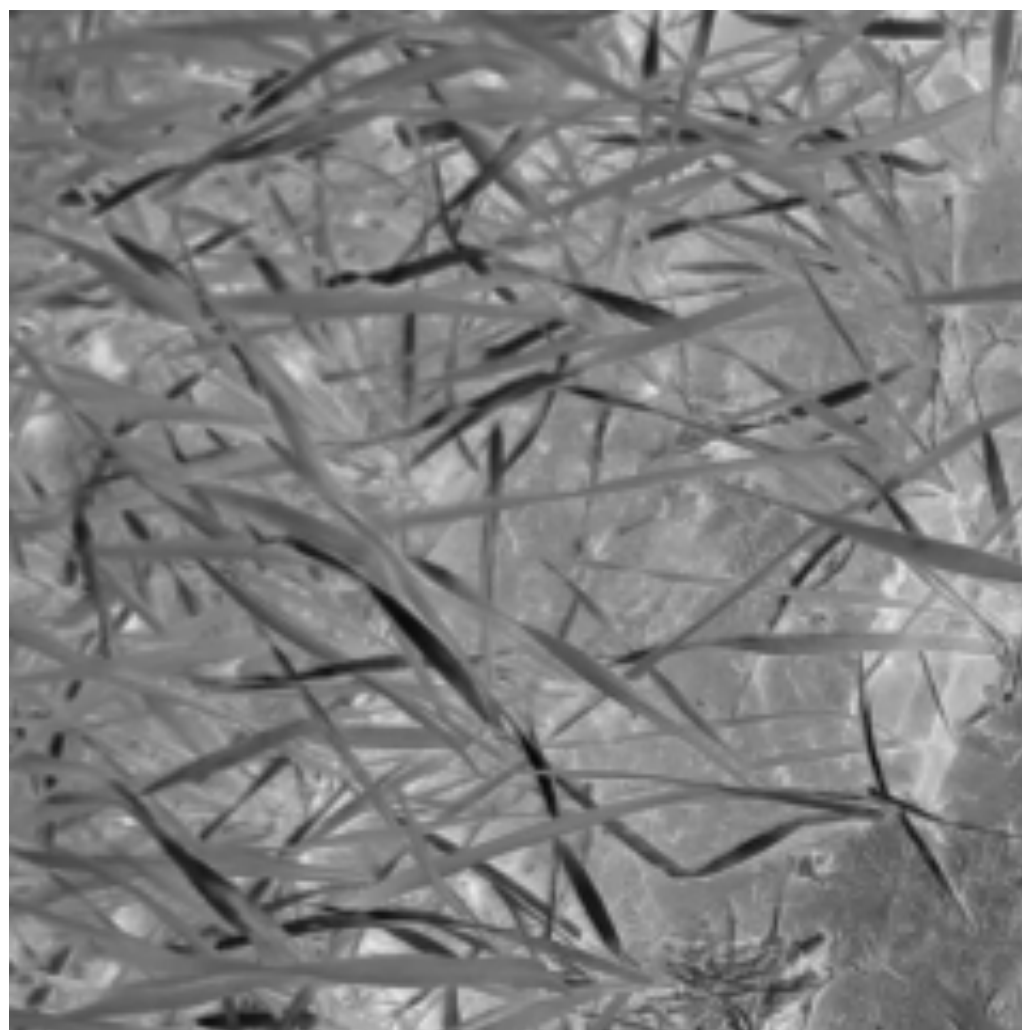

Q (from YIQ)

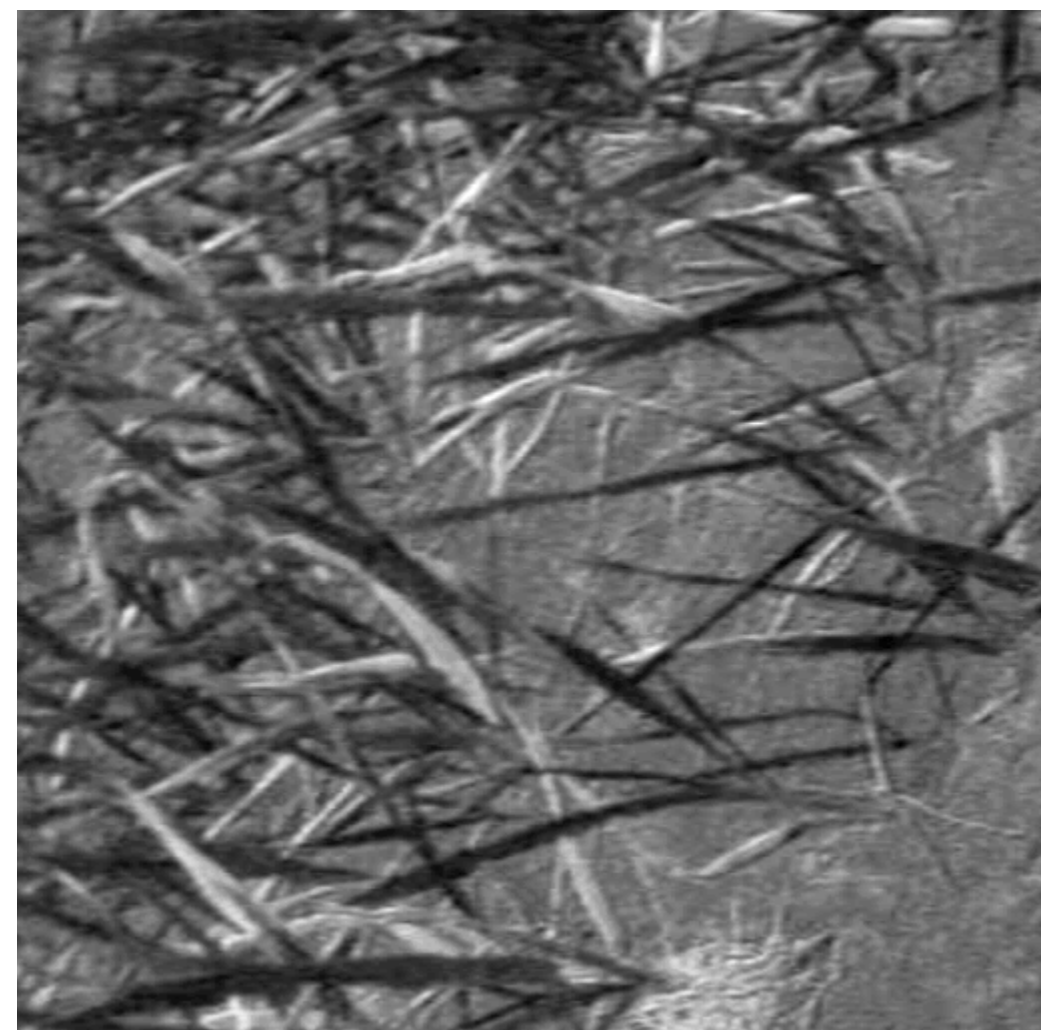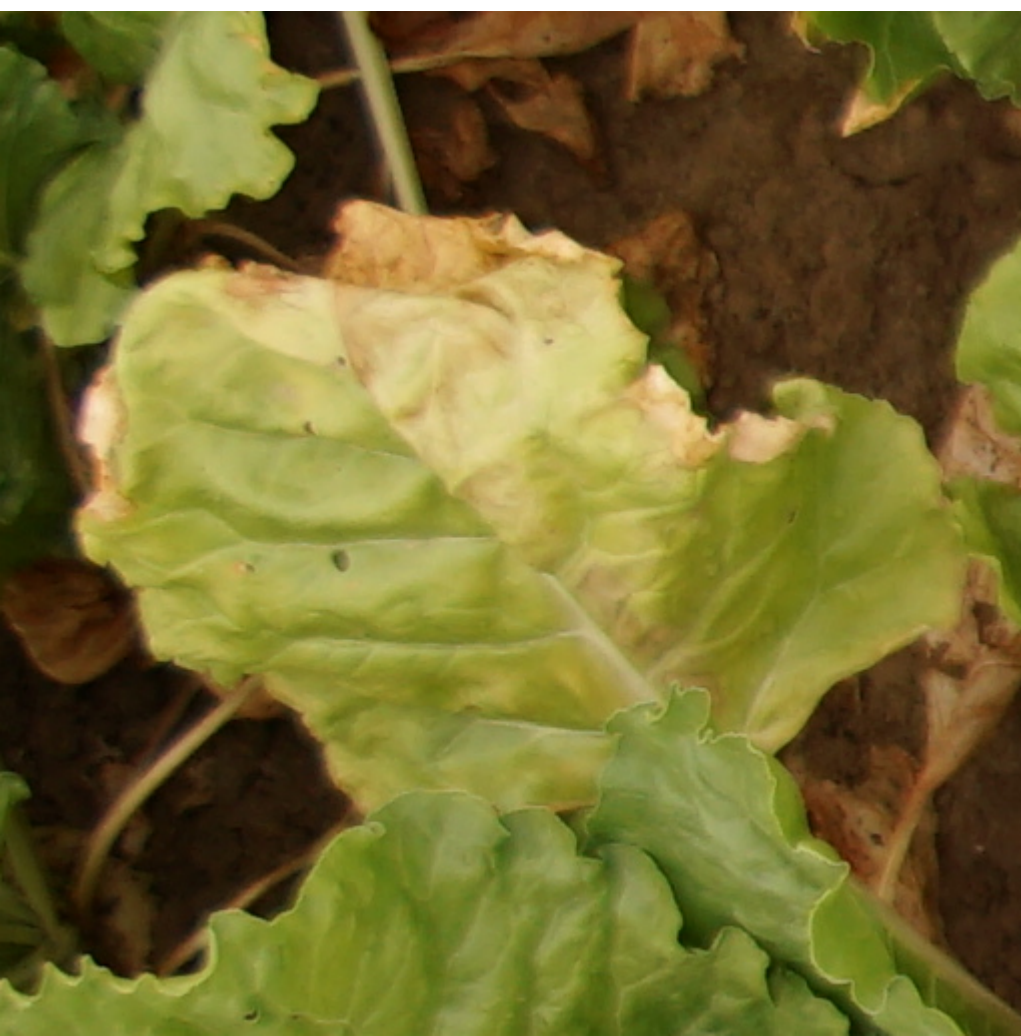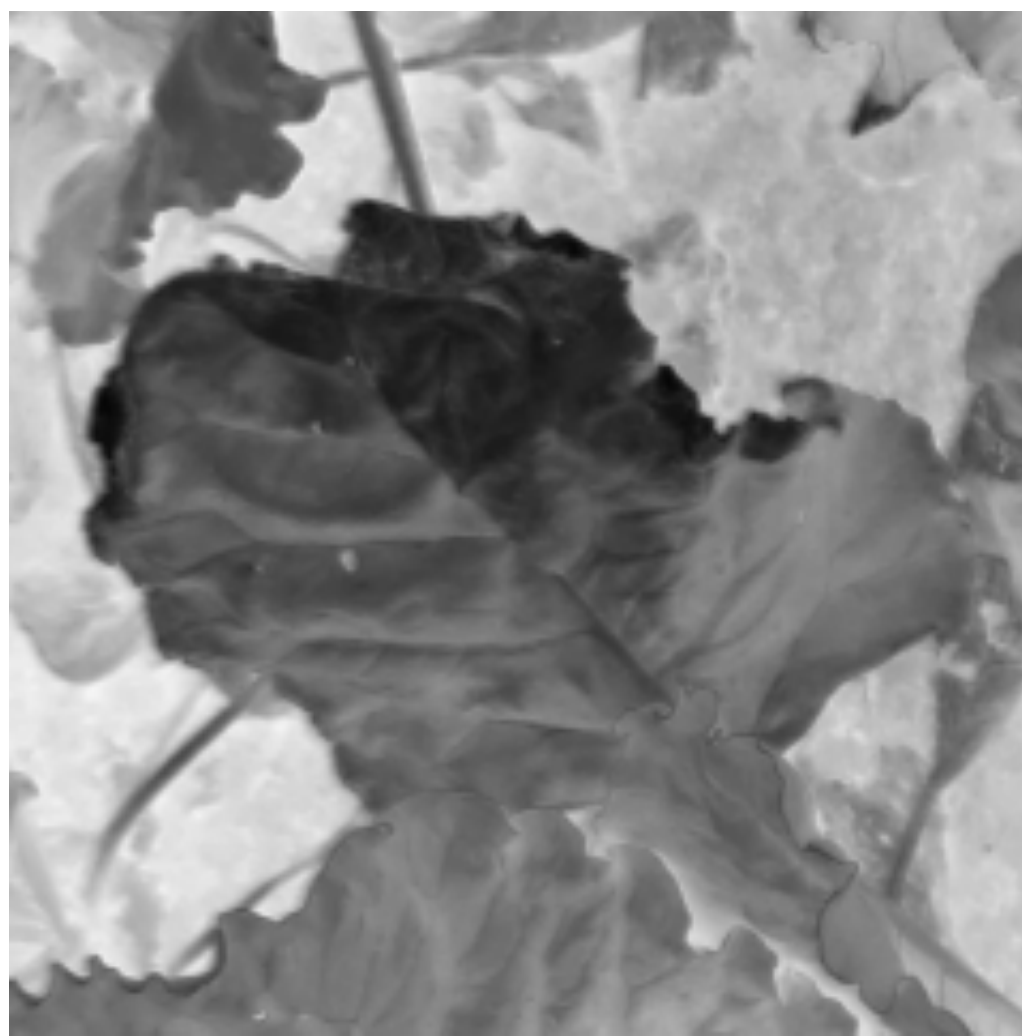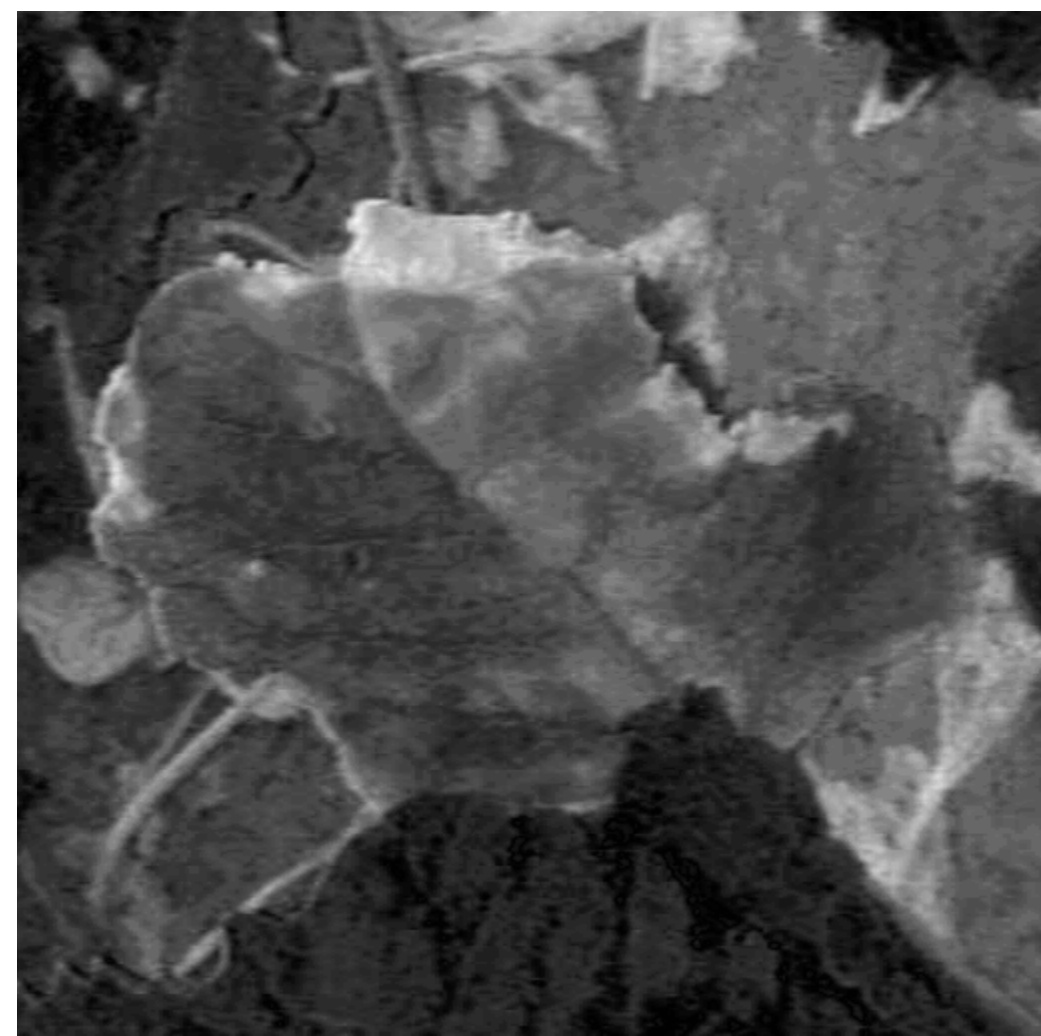

Supplement: 9803570.f5.pdf [file 9803570.f5.pdf]
